# Supplementary material
Source: publisher figshare collection journal article supplement (https://karger.figshare.com/ndownloader/files/26202152)
Supplement: Supplementary file 1 [file 26202152]

**Supplementary Table 1. Prevalence of 28 physical symptoms according to sex. (N=4106)**

| **Physical symptoms** | **Total (n, %)**  **(4106)** | **Men (n, %)**  **(1714)** | **Women (n, %)**  **(2392)** | **P value** |
| --- | --- | --- | --- | --- |
| Headache | 1042(25.4) | 339(19.8) | 703(29.4) | <0.001 |
| Dizziness | 1137(27.7) | 397(23.2) | 740(30.9) | <0.001 |
| Salivation | 173(4.2) | 73(4.3) | 100(4.2) | 0.90 |
| Slurred speech | 131(3.2) | 61(3.6) | 70(2.9) | 0.26 |
| Numbness | 790(19.2) | 274(16.0) | 516(21.6) | <0.001 |
| Cough/expectoration | 802(19.5) | 351(20.5) | 451(18.9) | 0.20 |
| Coughing up blood | 71(1.7) | 28(1.6) | 43(1.8) | 0.69 |
| Shortness of breath | 772(18.8) | 265(15.5) | 507(21.2) | <0.001 |
| Chest tightness | 644(15.7) | 237(13.8) | 407(17.0) | 0.006 |
| Chest pain | 664(16.2) | 234(13.7) | 430(18.0) | <0.001 |
| Palpitation | 414(10.1) | 138(8.1) | 276(11.5) | <0.001 |
| Syncope | 162(4.0) | 70(4.1) | 92(3.8) | 0.70 |
| Joint pain | 1365(33.2) | 489(28.5) | 876(36.6) | <0.001 |
| Joint stiffness | 768(18.7) | 271(15.8) | 497(20.8) | <0.001 |
| Back pain | 1341(32.7) | 467(27.2) | 874(36.5) | <0.001 |
| Swollen legs | 400(9.7) | 116(6.8) | 284(11.9) | <0.001 |
| Nausea/vomiting | 316(7.7) | 96(5.6) | 220(9.2) | <0.001 |
| Blood in vomit | 33(0.8) | 15(0.9) | 18(0.8) | 0.66 |
| Blood in stool | 62(1.5) | 32(1.9) | 30(1.3) | 0.11 |
| Dry or bitter mouth | 1166(28.4) | 418(24.4) | 748(31.3) | <0.001 |
| Diarrhea/constipation | 306(7.5) | 105(6.1) | 201(8.4) | 0.006 |
| Body lump | 137(3.3) | 42(2.5) | 95(4.0) | 0.007 |
| Urinary tract irritation* | 422(10.3) | 212(12.4) | 210(8.8) | <0.001 |
| Fever | 460(11.2) | 142(8.3) | 318(13.3) | <0.001 |
| Night sweating | 775(18.9) | 278(16.2) | 497(20.8) | <0.001 |
| Toothache | 648(15.8) | 230(13.4) | 418(17.5) | <0.001 |
| Dry eyes | 975(23.8) | 334(19.5) | 641(26.8) | <0.001 |
| Itching | 603(14.7) | 250(14.6) | 353(14.8) | 0.88 |

*: Urinary tract irritation: frequent urination or urgent need to urinate or painful urination
